# Supplementary material
Source: PubMed Central journal article supplement (PMC7745837)
Supplement: NIHMS981864-supplement-Supp_info.pdf [file NIHMS981864-supplement-Supp_info.pdf]

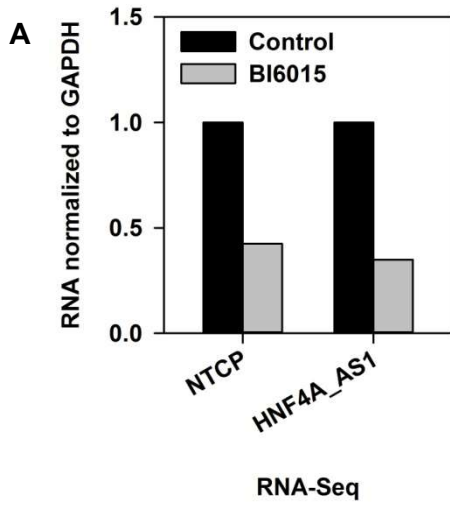

**Fig. S1. (A)** RNA-seq data comparing the mRNA changes of NTCP and *HNF4A-AS1* in primary human hepatocytes treated with an HNF4 $\alpha$  inhibitor BI6015 (10  $\mu$ M) for 24 h. **(B)** Tissue distribution of *HNF4A-AS1* in humans (from NCBI Gene database).

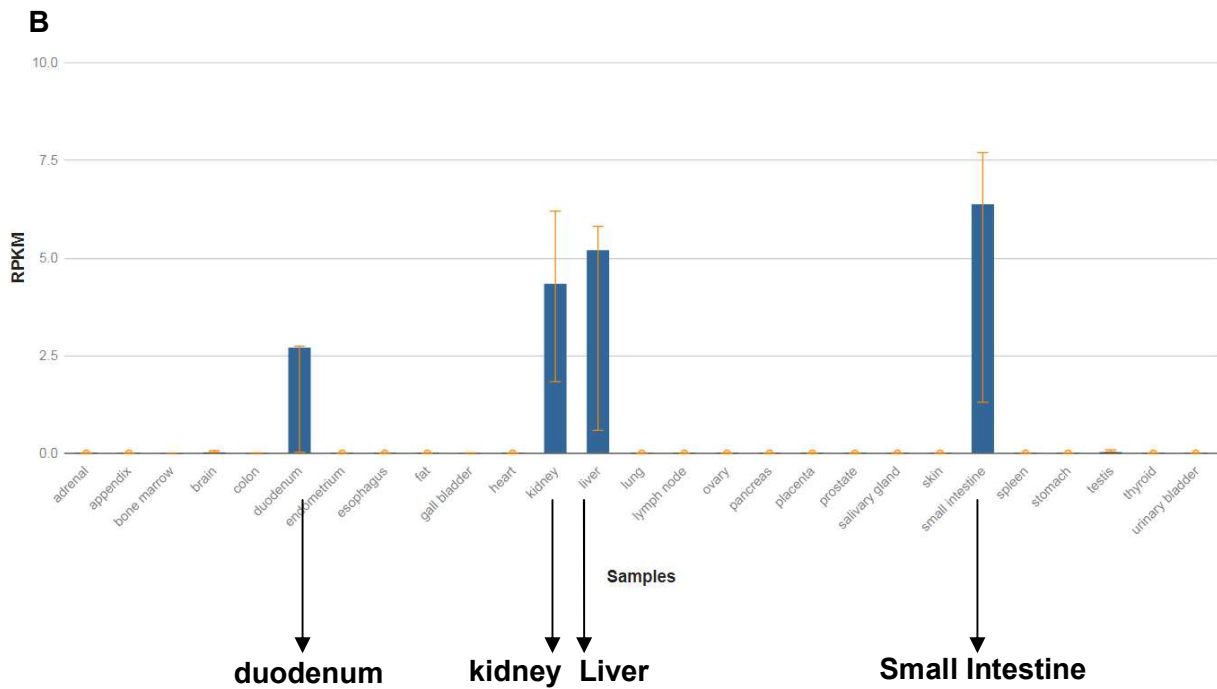

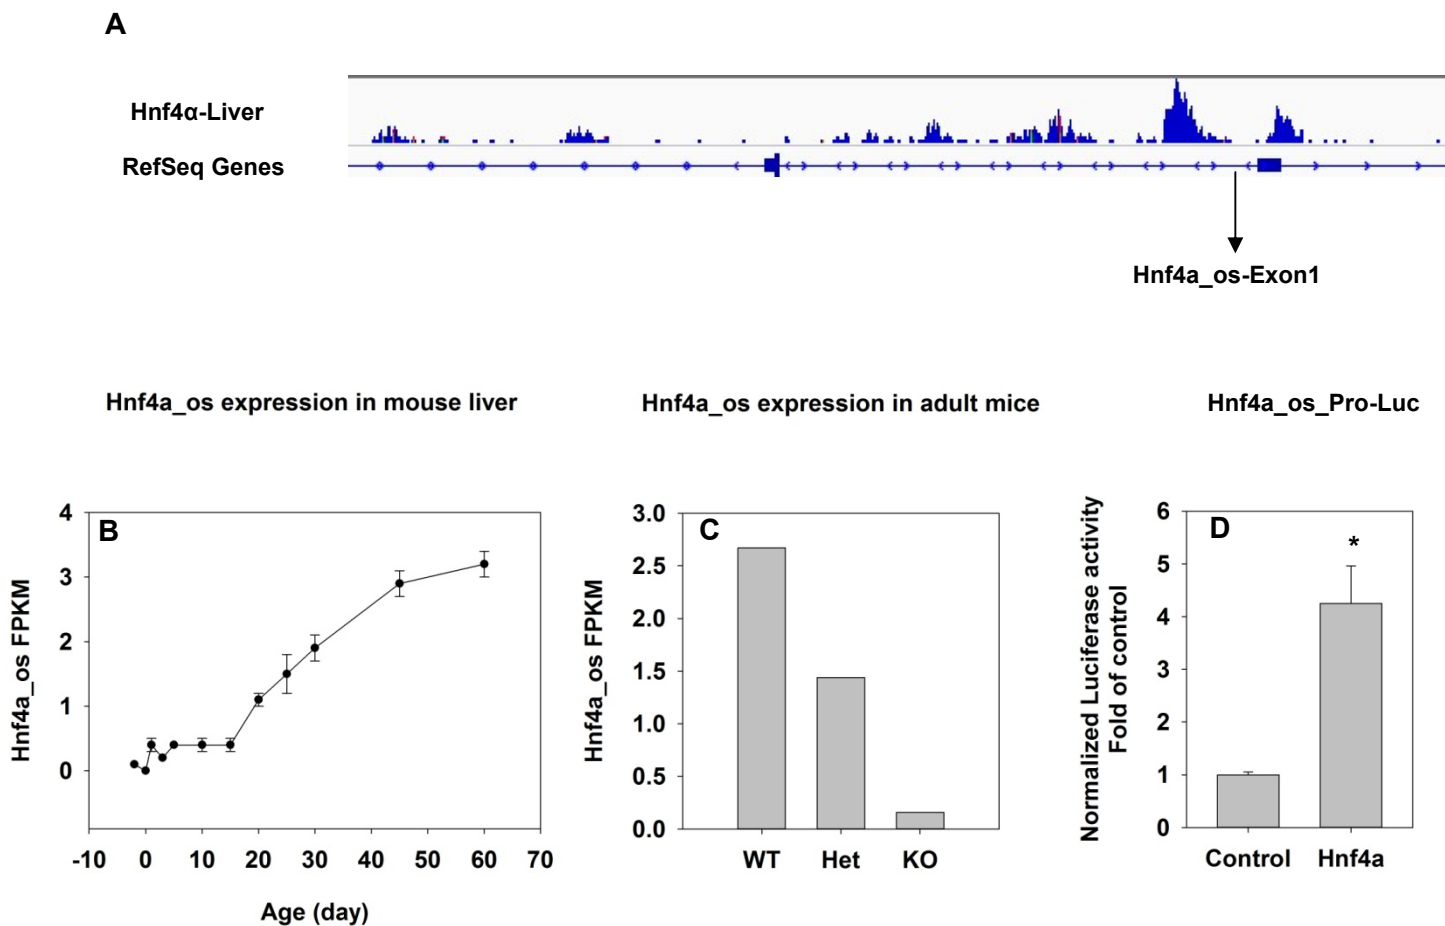

**Fig. S2. (A)** ChIP-seq data of the binding of Hnf4α to the promoter and exons of Hnf4α os in adult wildtype mouse liver. **(B)** RNA-seq data of expression of Hnf4α os in the developing wildtype mouse liver (GSE58827). N=3, mean ± SE. **(C)** RNA-seq data of pooled liver total RNAs that indicate the difference in Hnf4α os expression in livers from adult male WT mice and mice with liver-specific heterozygous (Het) and knockout (KO) of Hnf4α. **(D)** Dual-luciferase reporter activities of Hnf4α os-Pro-Luc induced by Hnf4α in HEK293 cells. N=4, mean ± SE. \* p<0.05 vs control.

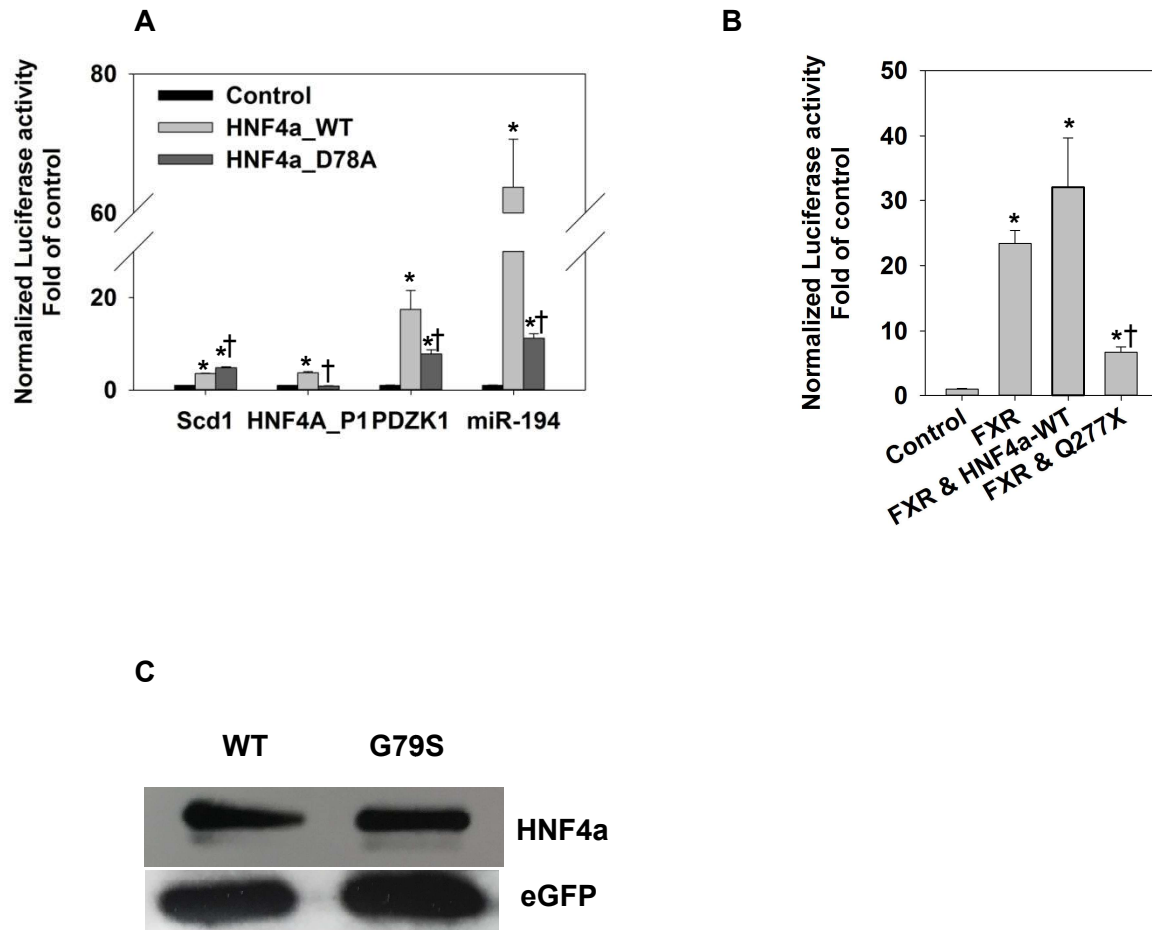

**Fig. S3. (A)** Effects of wildtype (WT) and D78A mutant of HNF4 $\alpha$ 2 on luciferase activities of promoters of Scd1, HNF4A P1, PDZK1, and miR-194 in HEK293 cells. N=4, mean  $\pm$  SE. \*p<0.05 vs control. † p<0.05 vs HNF4 $\alpha$ \_WT. **(B)** Effects of HNF4 $\alpha$ -Q277X mutant on the FXR-transactivated BSEP promoter in HEK293 cells. N=4, mean  $\pm$  SE. \*p<0.05 vs control. † p<0.05 vs HNF4 $\alpha$ \_WT. **(C)** Western blot determination of the protein expression of the transiently transfected HNF4 $\alpha$ \_WT, HNF4 $\alpha$ \_G79S, and the co-transfected eGFP protein in HEK293 cells.

**Supplemental Table 1. Sequence information of vector constructions**

| Name of Plasmids           | Engineered motifs                                                             | Sequence                                                                                                                                                                                                                                                                                                                                                                                                                                                                                                                                                                                                                                                                                                                                                                                                                                                                                                                                                                                                                                      |
|----------------------------|-------------------------------------------------------------------------------|-----------------------------------------------------------------------------------------------------------------------------------------------------------------------------------------------------------------------------------------------------------------------------------------------------------------------------------------------------------------------------------------------------------------------------------------------------------------------------------------------------------------------------------------------------------------------------------------------------------------------------------------------------------------------------------------------------------------------------------------------------------------------------------------------------------------------------------------------------------------------------------------------------------------------------------------------------------------------------------------------------------------------------------------------|
| HNF4A-P1-Luc               | 985 bp Proximal promoter of HNF4A-P1 Promoter (-985 ~ +1 bp)                  | agaacaggggatggcaaggggatacgaacagggagagggaggaggg<br>gaagaggaaggacgctaccaggcccaactggtgctgattatgccatctatttct<br>tctcaaacaccctttgaagtgtatttacattttacagaaaaggaaactgaggctcg<br>agaggagaatcatctaccagggccaggttagtagacggtaggtgctgaatgtaa<br>atccaggtctctgctcctgctccgggaggggtgggggtgagggaaacaggagaatg<br>tgatgggaaaatccgagatggagccagcctgggcccagaaacactgggagctgtg<br>ggagacggagaggggaggggtgggatcacagggagcaggagcggggaattgg<br>aggtgaatctggccctcccaactccagctccattctgctcccaggggaaccgggaa<br>actgcgggggaactggaagggagctcccagaacaaggatccagaagattggcat<br>ctgggctgggatttaggttctaaatcgtggccatggggcagcctatctctgcaa<br>aagcattgaggtagaagtcattgattgggaattgaattaggggatctcggag<br>gtaggctgcagtgctgatagatcagttagaatgctgactgggggtgacaatggct<br>tggaggggtgggtgagtcagggtcaaatgagtgcccgtgagtcagtgctgctcct<br>gtacaattgataactgaacatcggtaggttagggcccagcagctgtaattgacc<br>ccgggtgcacagccagaaccaacaacagccaaatccctgcagcccgccca<br>gcctatccaccggcggggacgattaaccattaacccccaccctcccggcag<br>agcctccaccctcacagaggctaggccaagactcccagcagatctcccagagg<br>acggtttgaaaggaaggcagagagggcacT |
| pGL3T7-5'UTR               | 89 bp 5'UTR of P1-HNF4A                                                       | GGGAGGAGGCAGTGGGAGGGCGGAGGGGCGGGGCCTT<br>CGGGGTGGGCGCCAGGGTAGGGCAGGTGGCCGCGGC<br>GTGGAGGCAGGGAGA                                                                                                                                                                                                                                                                                                                                                                                                                                                                                                                                                                                                                                                                                                                                                                                                                                                                                                                                              |
| HNF4A-P1-5'UTR-Luc         | 985 bp Proximal promoter of HNF4A-P1 Promoter                                 | Same as above                                                                                                                                                                                                                                                                                                                                                                                                                                                                                                                                                                                                                                                                                                                                                                                                                                                                                                                                                                                                                                 |
|                            | 89 bp 5'UTR of P1-HNF4A                                                       | Same as above                                                                                                                                                                                                                                                                                                                                                                                                                                                                                                                                                                                                                                                                                                                                                                                                                                                                                                                                                                                                                                 |
| HNF4A-AS1-Pro-Luc          | 313 bp Proximal promoter and exon 1 of HNF4A-AS1 (-168 ~ +145 bp)             | tttctccccaccaccactccgggagaggtgcagagaaaactgggacttatcaag<br>acaaagaacaaaagtcgtggaggaagaagccaagccatctctactctgggg<br>tagggccctcagtttggcccttgaaattcaaattccagtttgagacaagtcCTA<br>ACTATCTCACAAATATAGGTCCCCAACCACAGACCAACTC<br>CAGTCCAGGCAGCCACCAGCTGGCCTGGTCTTGCTGCTT<br>CCTTTAGCGGCCTTCCAAGGTCCAGGGACAGGGGGTCTG<br>GGCCACCAAGAGGCTCTGCTAGGCT                                                                                                                                                                                                                                                                                                                                                                                                                                                                                                                                                                                                                                                                                                        |
| HNF4A-AS1-Dis-P1-5'UTR-Luc | 313 bp The reverse complementary strand of the proximal promoter of HNF4A-AS1 | agcctagcagagcctctgtggccagaccctgtcccaggacctggaagccgc<br>taaaggaagcagcaagaccaggccagctggtggctgacctggactggagttggctca<br>gtggttggggacctatattgtgagatagtaggactttgccaacaactggaattgaaa<br>tttcaaggggcaaaactgaagggccctaccagagtagagatggctcttgcttc<br>ttcctccacgactttgtctttgtctgtgataagtcagtttctctgcacctctccggagt<br>ggtgggtggggaagaaaa                                                                                                                                                                                                                                                                                                                                                                                                                                                                                                                                                                                                                                                                                                                   |
|                            | 985 bp HNF4A-P1 proximal promoter                                             | Same as above                                                                                                                                                                                                                                                                                                                                                                                                                                                                                                                                                                                                                                                                                                                                                                                                                                                                                                                                                                                                                                 |
|                            | 89 bp 5'UTR of P1-HNF4A                                                       | Same as above                                                                                                                                                                                                                                                                                                                                                                                                                                                                                                                                                                                                                                                                                                                                                                                                                                                                                                                                                                                                                                 |
| HNF1A-Pro                  | 135 bp Proximal promoter of HNF1A (-105 ~ +30bp)                              | tgccctctccgctgcatgagggctgcactttgcaggctgaaatccaaagttcagtc<br>ccttcgtaagcacaggaataatgaaccctggagaattccccAGCTCCAA<br>TGTAACAGAACAGGCAGGGGC                                                                                                                                                                                                                                                                                                                                                                                                                                                                                                                                                                                                                                                                                                                                                                                                                                                                                                        |
| PDZK1-Pro-Luc              | 224 bp human PDZK1 proximal promoter and 5' UTR (-141 ~ +83 bp)               | gagcttttggttctgaggtttgtcagatttccagctcagggccagccagctggcag<br>gaagcaggacagaggtcactgaattcagaccacatgctccctgttaatacattagct<br>ttaaatcaatctttgtcacaagTCCA GTGAGTTGCAAGCTTAATGCT<br>CACCTGCAGAGACAGAATTCCTGAGTGAACGAACAGAGC<br>AGCTCCTCTCCATCTCCA                                                                                                                                                                                                                                                                                                                                                                                                                                                                                                                                                                                                                                                                                                                                                                                                    |

|                 |                                                                  |                                                                                                                                                                                                                                                                                                                                                                                                                                                                                                                                                                                                                                                                                                                                                                                                                                                                                                                                                                                                                                                                                                                                                                                                                                                                                                                                                                                                                                                                                                                                                                                                      |
|-----------------|------------------------------------------------------------------|------------------------------------------------------------------------------------------------------------------------------------------------------------------------------------------------------------------------------------------------------------------------------------------------------------------------------------------------------------------------------------------------------------------------------------------------------------------------------------------------------------------------------------------------------------------------------------------------------------------------------------------------------------------------------------------------------------------------------------------------------------------------------------------------------------------------------------------------------------------------------------------------------------------------------------------------------------------------------------------------------------------------------------------------------------------------------------------------------------------------------------------------------------------------------------------------------------------------------------------------------------------------------------------------------------------------------------------------------------------------------------------------------------------------------------------------------------------------------------------------------------------------------------------------------------------------------------------------------|
| miR-194-Pro-Luc | 405 bp human miR-194-2 promoter (-405 ~ +1 bp)                   | tctctgccccatggctgcagcagggagggggggcagaggtgacagtggccaaacctgaaactgaggccagctctggttgggaaagaacaaggaaacaaaa<br>taacttggggacagagggcgtgggtcatcagagcgggcaaaggctgccagga<br>gtgtaaatccgagccgctcccggcttatgaggccgattggggtgagcctggacttt<br>gcccaggaaggagtgtcggcagcacacggggcgccaggtgtggccccggatg<br>ataagaagcctcggtgaaaagaccatggacctggggccacgaagactggggagc<br>ccaggtagtgggcatgggacactctccagagccctgccgaaggcggagccag<br>gcagggccccgggtctcaatT                                                                                                                                                                                                                                                                                                                                                                                                                                                                                                                                                                                                                                                                                                                                                                                                                                                                                                                                                                                                                                                                                                                                                                          |
| Scd1-Pro-Luc    | 728 bp Mouse Scd1 promoter and 5' UTR (-708 ~ + 20 bp)           | cagagggcgggtccccggcagacggagcccaatgagtgagtgcagttgtaactcagc<br>gtgtgctgtcaagaacgcagcagcaaccggatgctggctgaagggatacactattgt<br>ttccccgggtcagagccctggggcgaccctcatatcccagctccccggggttctcttg<br>ctggtgcttgaagtgggggtgatgtgaagttagaccgagttgtgagtgggcgttag<br>ccagtgcttctcacttcttctgatgcgattccccagtgaaaccattgtcaagcggcag<br>accaaagtctaggcctgcacacaattcctacttgaatcacgttatcctgctctaaag<br>aaaagtcacccatcagcccacagcaaaaggagataaggagaaaaagaggggag<br>gagagagcgagaagctagaggcagagggaacagcagattgcgcttagccaatg<br>gaaaaggcaggacaaggtggcaccaaaactcttggccaatgacaagacgggctt<br>cacaggaggacattagcattatcccaggcagggggttgagcagcgccct<br>gtgatgcctcagcatcccggcgcctccaaggctactctggaatctacttggcttctt<br>cccgtcttgggtcccgcctctctctcccctcccctcccctcccctcccctccc<br>tcccctcccctccctCACCTCCACGCCTGGCTTCC                                                                                                                                                                                                                                                                                                                                                                                                                                                                                                                                                                                                                                                                                                                                                                                                                            |
| BSEP 1445-Luc   | 1531 bp human BSEP proximal promoter and 5' UTR (-1445 ~ +86 bp) | ttgactgctgtcaataactcagcacagcaaaggtagcaaaatctattgggaatcttt<br>cccaatcaaagctacagccccatagctgtgtgcttttggtttggtaagcaaaatt<br>ttttctgggtcctaattggtgccaatccaatattactacatttgcgcaactcagaagt<br>caaccattcagttgcatagaggaaacatctagaatcttgccttcttctgacacttg<br>atataattgagattgaacataataaacataaaaattatggtataatttgggtttatg<br>ggtaagtataaacctctatacataaaattccaatagagaaaaatggtggatgct<br>gaatttaataaaaaattatgacagagaaacctaaaattgagaaaaattgatctaca<br>gttaatttctgcaaatagaagcactggccatcaattgcattcagagcacagagt<br>ggaagaaggtagcacagactggcatgtgctcacatctactagttgtcaccttag<br>gaggattttaacctctctgtgctcagttcccactataaaatagaaatgacatgat<br>agcaccactcctagggtctgtgagaggcccaatgaggtgatataaataacattt<br>tgaagtgggcccaggcaccacaagcttgaccaatgtgacctattattattcattgc<br>tgaagctggagtgagaggcatttaggaaaagtaagctcaggcaaggagagaaa<br>aaataagaacattgtaggaaaaatggaaagattcacaagaaggagaggaaga<br>ggcagcacaataatattggaggagctccacatgcttattgactcaagacctgttcatt<br>gaaccttagaaaatcggtcatctttgcttatacagagcttcatctggtgtgcatgcca<br>gggtgcaagagttgctgtgactcagactttgagcaaggcgtttcaaatgttcttita<br>gggtatttctccacaaaactctatagctggccaggagcatctggatctctgcaacc<br>agggatttccaagagcaatctttatattgaggggaaagttaaggtattttttttt<br>tctgttatgttttaagtaactttcacaactacaggcctgtaaaaaataagggtgggat<br>agcctgaattccagggtctgtgctggccactctgctcaattgctctcgtccaagg<br>tgaatcagcaattccaaggcctgtgacaccctcagaggggttccaagcacactct<br>gtgtttgggttattgctctgagtatttctcgtatgtcactgaactgtgcttgggctgcct<br>tagggacattgatcttaggcaaatagataatgttctgaaaaagttgaattctgtcag<br>tgcttagAATGATGAAAACCGAGGTTGGAAAAGGTTGTGAAA<br>CCTTTAACTCTCCACAGTGGAGTCCATTATTTCTCTGG<br>CTTCCTCAAATTCATA |

**Note.** Lowercase sequences denote promoters and uppercase sequences denote exons.

Putative DNA-binding sites of transcription factors predicted by PROMO and HNF4 binding site scanner: HNF4α: green-shaded; HNF1α: yellow-shaded; HNF6: pink-shaded; SP1: grey-shaded; FXR: blue-shaded.

**Supplemental Table 2. Numerical changes induced by HNF4 $\alpha$  mutants on 3 HNF4 $\alpha$  target promoters**

| HNF4 $\alpha$ | HNF4A-AS1-Pro-Luc |          | HNF1A-Pro-Luc |          | miR194-Pro-Luc |          |
|---------------|-------------------|----------|---------------|----------|----------------|----------|
|               | VS control        | VS WT    | VS control    | VS WT    | VS control     | VS WT    |
| Wild Type     | ↑ 27 x *          | -        | ↑ 50 x *      | -        | ↑ 15 x *       | -        |
| D78A          | ↑ 19 x *          | ↓30.6% † | ↑ 42 x *      | N/S      | ↑ 3 x *        | ↓80.0% † |
| G79S          | N/S               | ↓93.5% † | ↑ 10 x *      | ↓81.0% † | N/S            | ↓92.2% † |
| R163X         | N/S               | ↓95.7% † | ↑ 4 x *       | ↓92.7% † | N/S            | ↓92.2% † |
| D215Y         | ↑ 26 x *          | N/S      | ↑ 45 x *      | N/S      | ↑ 8 x *        | ↓49.3% † |
| Q277X         | N/S               | ↓96.5% † | N/S           | ↓96.8% † | N/S            | ↓90.8% † |
| E285Q         | N/S               | ↓96.4% † | N/S           | ↓98.0% † | N/S            | ↓94.0% † |
| L341P         | ↑ 28 x *          | N/S      | ↑ 53 x *      | N/S      | ↑ 10 x *       | ↓38.1% † |
| W349X         | N/S               | ↓96.9% † | N/S           | ↓95.0% † | N/S            | ↓95.0% † |
| V402I         | ↑ 24 x *          | N/S      | ↑ 85 x *      | ↑70% †   | ↑ 12 x *       | N/S      |
| I463V         | ↑ 44 x *          | N/S      | ↑ 83 x *      | ↑66% †   | ↑ 17 x *       | N/S      |

**Supplemental Table 3. Numerical changes induced by HNF4 $\alpha$  mutants/HNF1 $\alpha$  on AS1-Dis-P1-5' UTR-Luc**

| HNF4 $\alpha$ | AS1-Dis-P1-5' UTR-Luc |          | AS1-Dis-P1-5' UTR-Luc with HNF1 $\alpha$ |       |                |
|---------------|-----------------------|----------|------------------------------------------|-------|----------------|
|               | VS control            | VS WT    | VS control                               | VS WT |                |
| Wild Type     | ↑ 3.7 x *             | -        | N/S                                      | N/S   |                |
| D78A          | N/S                   | ↓76.5% † |                                          |       |                |
| G79S          | N/S                   | ↓65.7% † |                                          |       |                |
| R163X         | N/S                   | ↓75.0% † |                                          |       |                |
| D215Y         | ↑ 2.1 x *             | ↓42.1% † |                                          |       |                |
| Q277X         | N/S                   | ↓76.3% † |                                          |       | Q277X ↓42.1% † |
| E285Q         | N/S                   | ↓82.7% † |                                          |       |                |
| L341P         | ↑ 1.5 x *             | ↓59% †   |                                          |       |                |
| W349X         | N/S                   | ↓80.1% † |                                          |       |                |
| V402I         | ↑ 2.8 x *             | N/S      |                                          |       |                |
| I463V         | ↑ 2.8 x *             | N/S      |                                          |       |                |

**Supplemental Table 4. Numerical changes induced by HNF4 $\alpha$  mutants/HNF1 $\alpha$ /HNF6 on PDZK1-Pro-Luc**

| HNF4 $\alpha$ | PDZK1-Pro-Luc |          | PDZK1-Pro with HNF1a |          | PDZK1-Pro with HNF6 |          |
|---------------|---------------|----------|----------------------|----------|---------------------|----------|
|               | VS control    | VS WT    | VS control           | VS WT    | VS control          | VS WT    |
| Wild Type     | ↑ 17 x *      | -        | ↑ 10 x *             | -        | ↑ 21 x *            | -        |
| D78A          | ↑ 8 x *       | ↓55.5% † | ↑ 6 x *              | N/S      | ↑ 17 x *            | N/S      |
| G79S          | ↑ 2 x *       | ↓87.8% † | ↑ 3 x *              | ↓75.1% † | ↑ 3 x *             | ↓84.0% † |
| R163X         | N/S           | ↓95.1% † | N/S                  | ↓92.7% † | N/S                 | ↓94.5% † |
| D215Y         | ↑ 12 x *      | N/S      | ↑ 9 x *              | N/S      | ↑ 16 x *            | N/S      |
| Q277X         | N/S           | ↓95.7% † | N/S                  | ↓95.6% † | N/S                 | ↓95.8% † |
| E285Q         | N/S           | ↓95.8% † | N/S                  | ↓93.0% † | N/S                 | ↓94.9% † |
| L341P         | ↑10 x *       | ↓41.5% † | ↑ 6 x *              | ↓44.7% † | ↑ 9 x *             | ↓56.2% † |
| W349X         | N/S           | ↓95.1% † | N/S                  | ↓90.2% † | N/S                 | ↓95.8% † |
| V402I         | ↑ 14 x *      | N/S      | ↑ 8 x *              | N/S      | ↑ 17 x *            | N/S      |
| I463V         | ↑ 13 x *      | N/S      | ↑ 11 x *             | N/S      | ↑ 19 x *            | N/S      |

**Symbols & Notes** "VS control": The luciferase activity versus control (No HNF4 $\alpha$  added) "VS WT": The Promoter activity regulated by mutant HNF4 $\alpha$  versus wild-type HNF4 $\alpha$  "↑" & "↓": increase and decrease; "x" : fold; "\*" & "†" : A statistical difference, p < 0.05 "N/S": Not a statistical difference
